# Supplementary material for: New Sustainable Process for Hesperidin Isolation and Anti-Ageing Effects of Hesperidin Nanocrystals
Source: PubMed Central journal article supplement (PMC7582684; doi:10.3390/molecules25194534), 2020-10-03
Supplement: molecules-25-04534-s001.pdf [file molecules-25-04534-s001.pdf]

## Supplementary Materials

# New Sustainable Process for Hesperidin Isolation and Anti-Ageing Effects of Hesperidin Nanocrystals

Danijela Stanisic <sup>1</sup>, Leticia H. B. Liu <sup>1</sup>, Roney V. dos Santos <sup>1</sup>, Amanda F. Costa <sup>1</sup>, Nelson Durán <sup>2,3</sup> and Ljubica Tasic <sup>1,\*</sup>

<sup>1</sup> Biological Chemistry Laboratory, Organic Chemistry Department, Institute of Chemistry, University of Campinas (UNICAMP), 13083-970, Campinas, SP, Brazil; dacici.stanisic@gmail.com (D.S.); leticia.bacellar@gmail.com (L.H.B.L.); torroney@gmail.com (R.V.d.S.); amanda.fc92@gmail.com (A.F.C.)

<sup>2</sup> Laboratory of Urogenital Carcinogenesis and Immunotherapy, Department of Structural and Functional Biology, University of Campinas, 13083-862, Campinas, SP, Brazil; nelsonduran1942@gmail.com

<sup>3</sup> Nanomedicine Research Unit (Nanomed), Federal University of ABC (UFABC), 09210-580, Santo André, SP, Brazil.

\* Correspondence: ljubica@unicamp.br; Tel.: +55-19-3521-1106

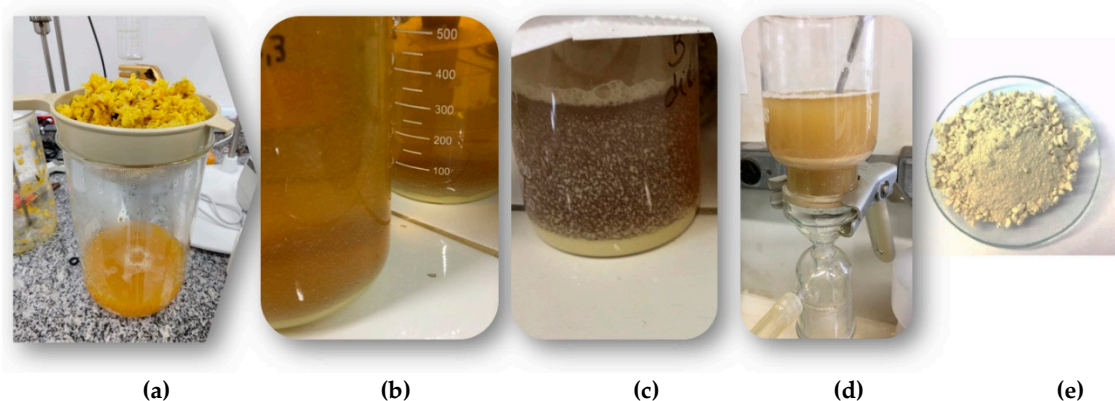

**Figure S1.** Steps used for hesperidin water extraction: (a) water extract obtained from orange peel (alkaline solution); (b) hesperidin precipitation after neutralisation and low pH; (c) precipitated hesperidin (4 °C); (d) filtration of precipitated hesperidin; (e) dried yellow powder of hesperidin.

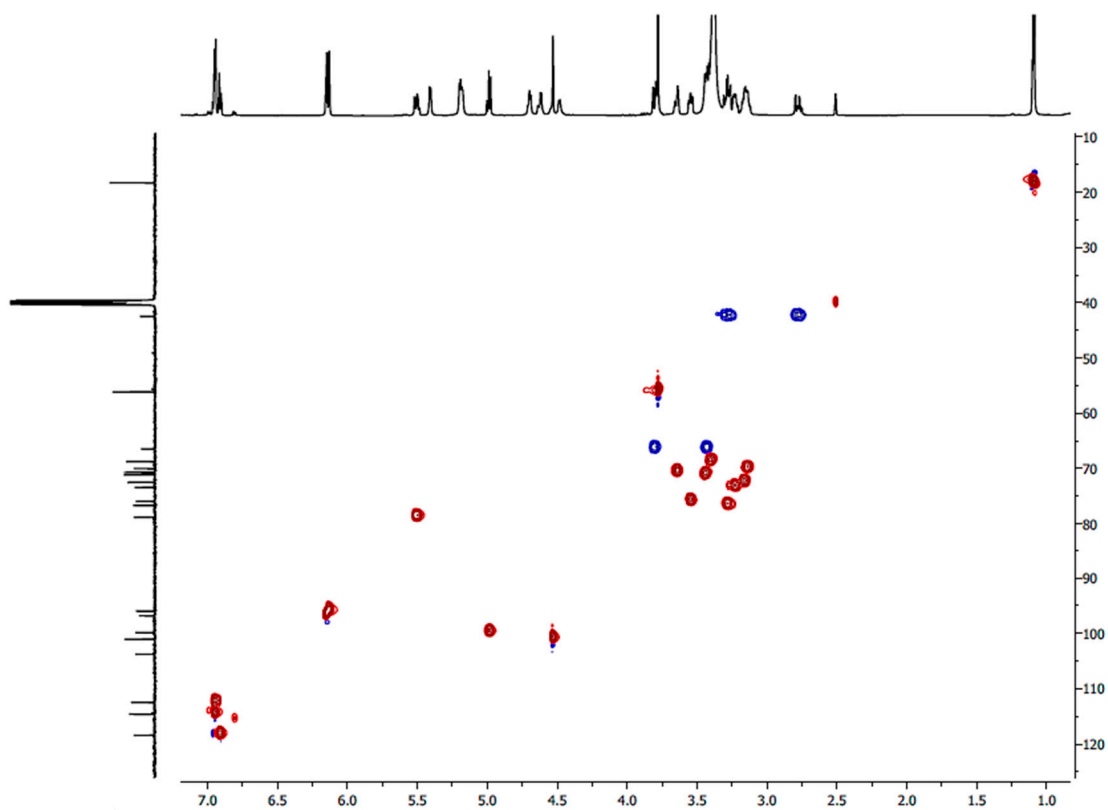

**Figure S2.** HSQC NMR data of obtained hesperidin (20 mg mL<sup>-1</sup>) in DMSO-*d*<sub>6</sub> (2.50 ppm; 39.50 ppm) as a solvent, on Bruker AVANCE III 600 MHz equipment at 25 °C.

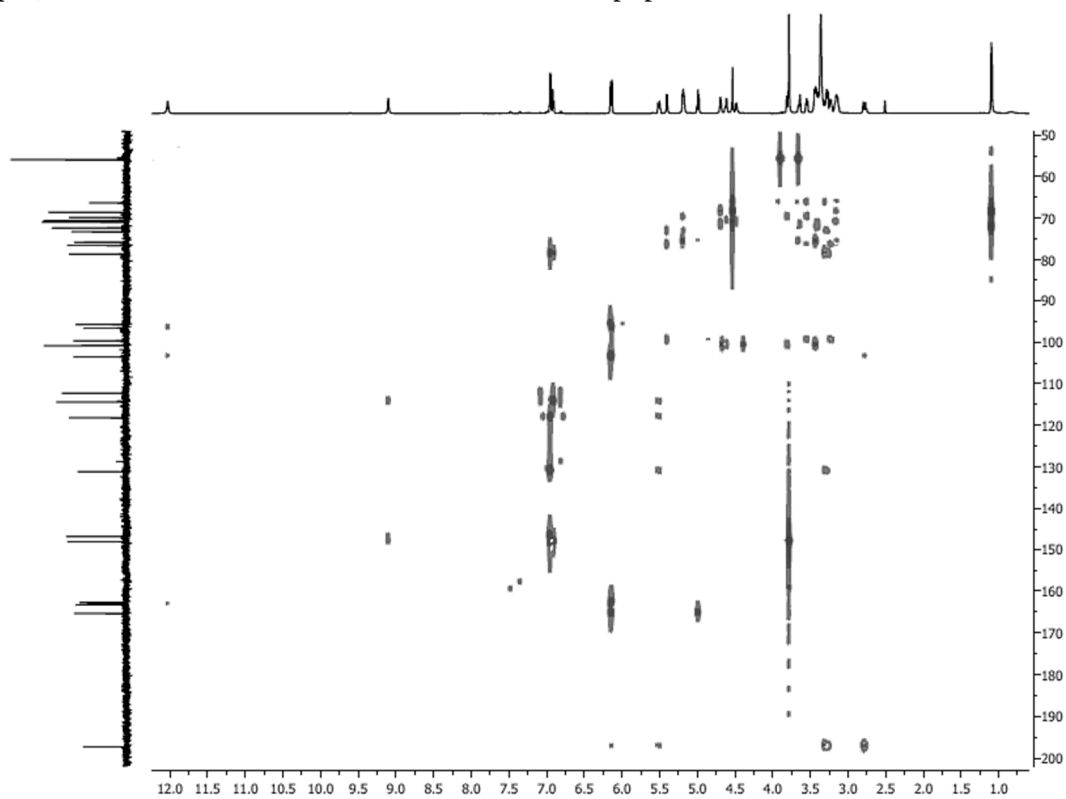

**Figure S3.** HMBC NMR data of obtained hesperidin (20 mg mL<sup>-1</sup>) in DMSO-*d*<sub>6</sub> (2.50 ppm; 39.50 ppm) as a solvent, on Bruker AVANCE III 600 MHz equipment at 25 °C.

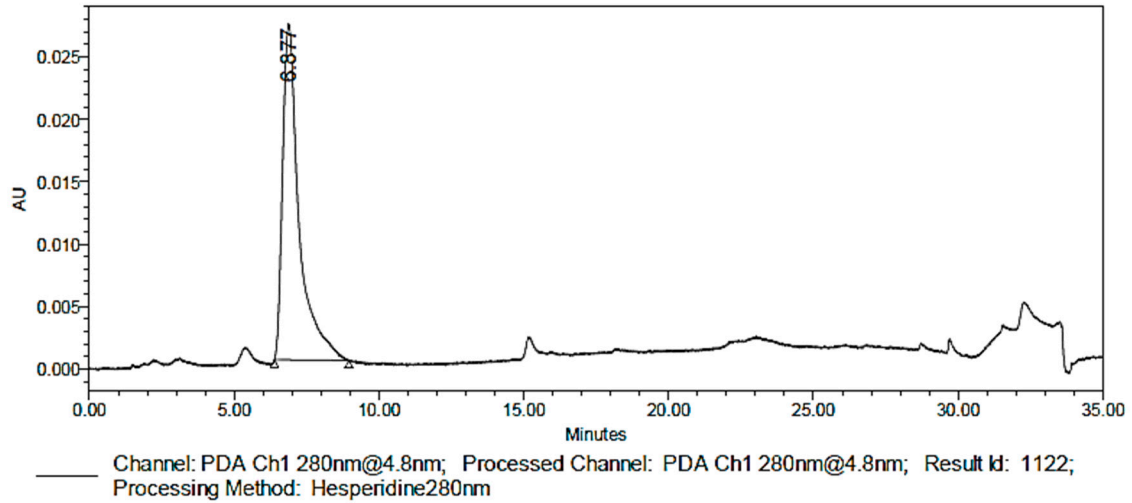

**Figure S4.** Chromatogram obtained from injection of obtained hesperidin sample in ultra-high-performance liquid chromatography (UHPLC) with reverse phase C18; the peak with the retention time at 6.877 min corresponds to hesperidin.

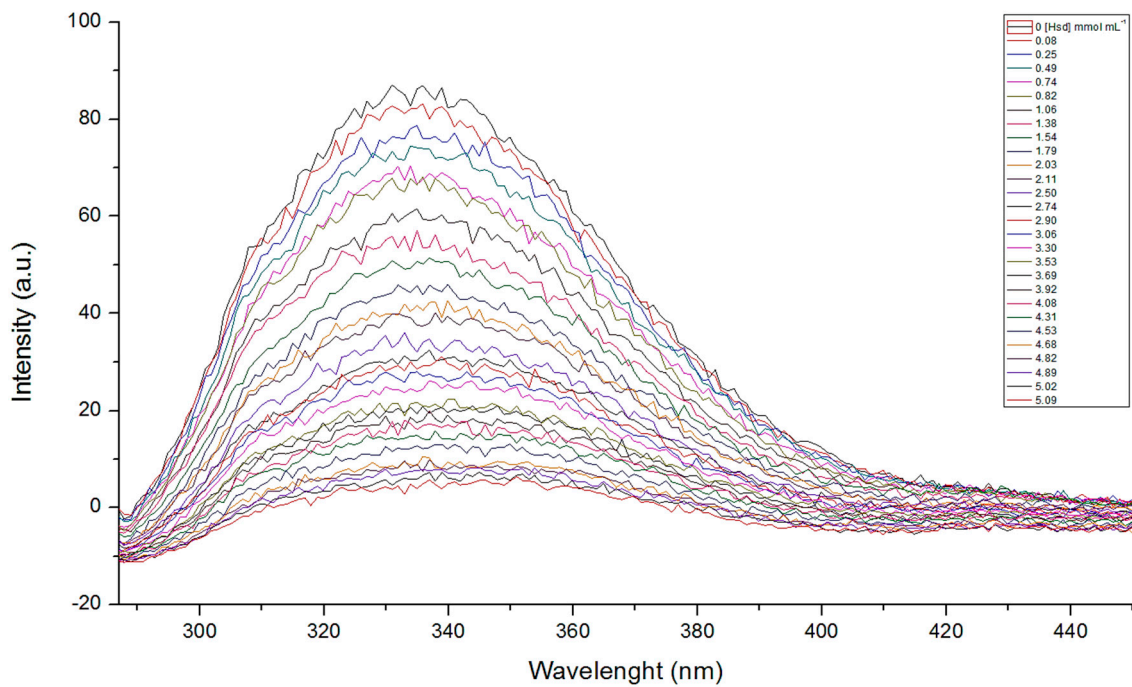

**Figure S5.** Fluorescence suppression - quenching effect of obtained hesperidin solution in DMSO (concentration from 0.00 to 5.09 mmol L<sup>-1</sup>) on collagenase (*Clostridium histolyticum*, Sigma Aldrich) at 37 °C.

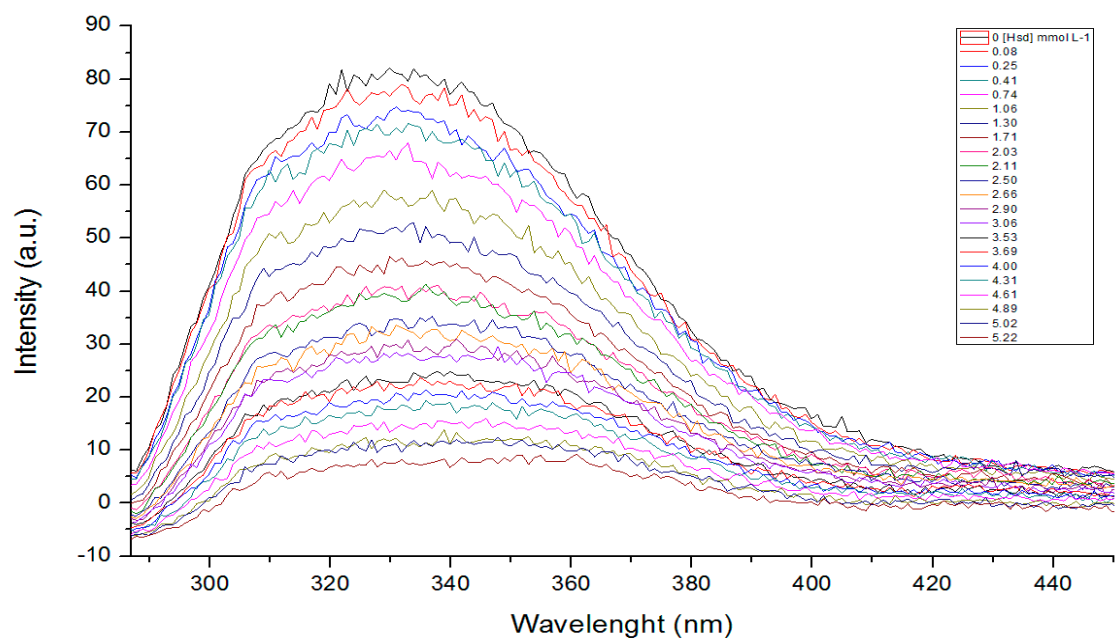

**Figure S6.** Fluorescence suppression - quenching effect of obtained hesperidin solution in DMSO (concentration from 0.00 to 5.22 mmol L<sup>-1</sup>) on collagenase (*Clostridium histolyticum*, Sigma Aldrich) at 30 °C.
